# Supplementary material for: Impact of Recommended Maternal Vaccination Programs on the Clinical Presentation of SARS-CoV-2 Infection: A Prospective Observational Study
Source: PubMed Central journal article supplement (PMC7826802; doi:10.3390/vaccines9010031), 2021-01-08
Supplement: vaccines-09-00031-s001.pdf [file vaccines-09-00031-s001.pdf]

**Table S1.** List of hospitals included in the study ( $n=78$ ).

| <b>HOSPITAL</b>                                                               |
|-------------------------------------------------------------------------------|
| AGSE Hospital Axarquia                                                        |
| Complejo Asistencial de León                                                  |
| Complejo Hospitalario A Coruña                                                |
| Complejo Hospitalario de Jaén                                                 |
| Complejo Hospitalario San Millán y San Pedro                                  |
| Complejo Hospitalario Universitario de Pontevedra                             |
| Complejo Hospitalario Universitario de Ourense                                |
| HM Hospital Nuevo Belén                                                       |
| Hospital Alto Guadalquivir                                                    |
| Hospital Álvaro Cunqueiro (CHUVI)                                             |
| Hospital Arnau de Vilanova                                                    |
| Hospital Clínico de Santiago de Compostela                                    |
| Hospital Clínico San Carlos                                                   |
| Hospital Clínico San Cecilio (Complejo Hospitalario Universitario de Granada) |
| Hospital Clínico Universitario de Valladolid                                  |
| Hospital Clínico Universitario Virgen de la Arrixaca                          |
| Hospital Costa del Sol                                                        |
| Hospital d'Inca                                                               |
| Hospital de la Santa Creu i Sant Pau                                          |
| Hospital de Poniente                                                          |
| Hospital de Santa Caterina                                                    |
| Hospital de Son Llätzer                                                       |
| Hospital de Torrejón                                                          |
| Hospital de Vinalopó                                                          |
| Hospital del Mar                                                              |
| Hospital del Tajo                                                             |
| Hospital do Barbanza                                                          |
| Hospital Doce de Octubre                                                      |
| Hospital Donostia                                                             |
| Hospital General de L'Hospitalet                                              |
| Hospital General La Mancha Centro                                             |
| Hospital General Universitario de Ciudad Real                                 |
| Hospital General Universitario Gregorio Marañón                               |
| Hospital General Universitario Santa Lucía                                    |
| Hospital Infanta Margarita                                                    |
| Hospital Jerez de la Frontera                                                 |
| Hospital La Fe                                                                |
| Hospital La Línea                                                             |
| Hospital Parc Taulí                                                           |
| Hospital Puerta de Hierro                                                     |
| Hospital Quirón Pozuelo de Alarcón                                            |
| Hospital Quirónsalud Málaga                                                   |
| Hospital Rafael Méndez                                                        |
| Hospital Regional Universitario de Málaga                                     |
| Hospital Reina Sofía                                                          |
| Hospital San Pedro Alcántara                                                  |

---

Hospital Sant Joan de Reus

---

Hospital Santa Ana

---

Hospital Universitari Dexeus - Grupo Quirónsalud

---

Hospital Universitari Germans Trias i Pujol

---

Hospital Universitario Araba-Txagorritxu

---

Hospital Universitario Central de Asturias

---

Hospital Universitario de Basurto

---

Hospital Universitario de Burgos

---

Hospital Universitario de Cabueñes

---

Hospital Universitario de Ceuta

---

Hospital Universitario de Ferrol

---

Hospital Universitario de Fuenlabrada

---

Hospital Universitario de Girona Doctor Josep Trueta

---

Hospital Universitario de Salamanca

---

Hospital Universitario de Tarragona Juan XXIII

---

Hospital Universitario de Torre Vieja

---

Hospital Universitario Doctor Peset

---

Hospital Universitario Infanta Sofía

---

Hospital Universitario La Paz

---

Hospital Universitario Puerta del Mar

---

Hospital Universitario Río Hortega

---

Hospital Universitario Son Espases

---

Hospital Universitario Torrecárdenas

---

Hospital Universitario Virgen de las Nieves

---

Hospital Universitario Virgen de Valme

---

Hospital Universitario Virgen del Rocío

---

Hospital Universitario Virgen Macarena

---

Hospital Univesitario de Getafe

---

Hospital Univesitario Severo Ochoa

---

Hospital Viamed Santa Ángela de la Cruz

---

Hospital Virgen de la Concha

---

Hospital Virgen de la Luz

---
